# Supplementary material for: Optogenetic cleavage of the Miro GTPase reveals the direct consequences of real-time loss of function in Drosophila
Source: PLoS Biol. 2023 Aug 17;21(8):e3002273. doi: 10.1371/journal.pbio.3002273 (PMC10465005; doi:10.1371/journal.pbio.3002273)
Supplement: S1 Data — (XLSX) [file pbio.3002273.s002.xlsx]

## Sheet: Fig. 1D
mCherry_mito/cyto ratio
Before irradiation	Release	Recovery		Table Analyzed	mCherry_mito/cyto ratio						Number of families	1
4.13977	1.05358	5.89251									Number of comparisons per family	3
4.50339	1.28074	4.17023		Repeated measures ANOVA summary							Alpha	0.05
3.56288	1.13731	3.14706		Assume sphericity?	No
6.02068	1.22318	3.49273		F	143.5						Tukey's multiple comparisons test	Mean Diff.	95.00% CI of diff.	Below threshold?	Summary	Adjusted P Value
6.37867	1.43924	4.69503		P value	<0.0001						Before irradiation vs. Max release	3.803	3.165 to 4.440	Yes	****	<0.0001	A-B
6.44149	1.63992	5.37994		P value summary	****						Before irradiation vs. Recovery	-0.02856	-0.6167 to 0.5596	No	ns	0.9919	A-C
7.23071	1.26618	6.54018		Statistically significant (P < 0.05)?	Yes						Max release vs. Recovery	-3.831	-4.548 to -3.114	Yes	****	<0.0001	B-C
4.27149	1.1468	4.34268		Geisser-Greenhouse's epsilon	0.9485
7.37814	1.18187	6.15119		R squared	0.8567						Test details	Mean 1	Mean 2	Mean Diff.	SE of diff.	n1	n2	q	DF
5.68926	1.31269	5.39426									Before irradiation vs. Max release	5.027	1.225	3.803	0.2553	25	25	21.06	24
5.58741	1.0546	6.2855		Was the matching effective?							Before irradiation vs. Recovery	5.027	5.056	-0.02856	0.2355	25	25	0.1715	24
6.089	1.13463	9.18875		F	2.707						Max release vs. Recovery	1.225	5.056	-3.831	0.2871	25	25	18.87	24
4.22419	1.26875	5.31806		P value	0.0016
7.08753	1.43747	7.13227		P value summary	**
6.37972	1.67308	4.85681		Is there significant matching (P < 0.05)?	Yes
3.79569	1.1725	3.75146		R squared	0.1624
3.01952	1.04827	3.00245
6.24648	1.2537	6.64568		ANOVA table	SS	DF	MS	F (DFn, DFd)	P value
3.75196	1.21701	5.1891		Treatment (between columns)	242.8	2	121.4	F (1.897, 45.53) = 143.5	P<0.0001
4.25343	0.990226	5.09365		Individual (between rows)	54.97	24	2.29	F (24, 48) = 2.707	P=0.0016
3.31509	1.15847	4.07358		Residual (random)	40.62	48	0.8462
3.6643	1.29112	3.40364		Total	338.4	74
4.4523	1.16435	4.41999
3.37785	0.991028	3.43792		Data summary
4.82521	1.08453	5.39552		Number of treatments (columns)	3
				Number of subjects (rows)	25
				Number of missing values	0

## Sheet: Fig. 1E
EGFP_mito/cyto ratio
Before irradiation	Release	Recovery		Table Analyzed	eGFP_mito/cyto ratio						Number of families	1
98.79	123.896	119.506									Number of comparisons per family	3
43.552	27.8788	22.8548		Repeated measures ANOVA summary							Alpha	0.05
12.4636	9.16308	8.35195		Assume sphericity?	No
59.4393	97.0773	15.8269		F	0.5187						Tukey's multiple comparisons test	Mean Diff.	95.00% CI of diff.	Below threshold?	Summary	Adjusted P Value
31.3872	14.1687	15.2428		P value	0.5811						Before irradiation vs. Max release	3.285	-15.18 to 21.75	No	ns	0.8974	A-B
72.8841	124.787	180.534		P value summary	ns						Before irradiation vs. Recovery	-5.352	-29.73 to 19.02	No	ns	0.8483	A-C
56.8869	20.2502	37.2122		Statistically significant (P < 0.05)?	No						Max release vs. Recovery	-8.637	-29.51 to 12.24	No	ns	0.5636	B-C
11.0039	7.59222	17.2552		Geisser-Greenhouse's epsilon	0.9055
43.5523	34.1863	47.5077		R squared	0.02116						Test details	Mean 1	Mean 2	Mean Diff.	SE of diff.	n1	n2	q	DF
20.2235	24.003	16.5883									Before irradiation vs. Max release	59.69	56.41	3.285	7.396	25	25	0.6281	24
45.3627	77.566	68.0263		Was the matching effective?							Before irradiation vs. Recovery	59.69	65.04	-5.352	9.761	25	25	0.7754	24
108.635	128.837	87.2427		F	6.07						Max release vs. Recovery	56.41	65.04	-8.637	8.359	25	25	1.461	24
27.8071	45.9787	72.9983		P value	<0.0001
57.3282	41.0064	67.061		P value summary	****
43.3415	43.2107	32.998		Is there significant matching (P < 0.05)?	Yes
14.564	11.8694	11.6125		R squared	0.7482
55.2033	60.3405	85.9022
170.314	31.4609	83.8622		ANOVA table	SS	DF	MS	F (DFn, DFd)	P value
177.99	160.294	198.916		Treatment (between columns)	950.3	2	475.2	F (1.811, 43.46) = 0.5187	P=0.5811
14.8891	8.90606	32.9293		Individual (between rows)	133448	24	5560	F (24, 48) = 6.070	P<0.0001
14.8044	21.8638	24.7397		Residual (random)	43969	48	916
92.7263	30.8227	30.1493		Total	178367	74
124.899	142.32	59.577
52.1017	70.9834	110.113		Data summary
42.1531	51.7183	179.102		Number of treatments (columns)	3
				Number of subjects (rows)	25
				Number of missing values	0

## Sheet: Fig. 1F-G
Release half-time					Recovery half-time
1.247		Number of values	25		45.32		Number of values	25
0.848					60.03
2.411		Minimum	0.5373		58.98		Minimum	26.98
3.896		Maximum	3.896		39.56		Maximum	87.84
1.815		Range	3.359		58.38		Range	60.86
0.5373					71.2
1.312		Mean	1.635		36.68		Mean	53.55
0.9272		Std. Deviation	0.7518		46.48		Std. Deviation	16.63
1.704		Std. Error of Mean	0.1504		47.51		Std. Error of Mean	3.326
1.424					83.97
2.939					57.56
1.638					26.98
1.271					46.63
0.9296					55.55
1.765					71.97
0.8724					84.45
1.526					63.98
1.302					43.45
1.494					44.1
1.012					30.08
2.131					87.84
2.173					53.47
1.499					43.43
1.487					32.31
2.709					48.95
Recovery kinetics
Time	Normalised cytosolic fluorescence
0.1	0.831803	0.92184	0.967972	0.592422	0.644619	0.595093	1	0.793218	0.83531	0.97754	1	0.83744	0.901452	0.755309	0.653881	0.841646	0.769114	0.792335	0.812823	0.985051	0.962176	0.96816	1	0.986175	0.791032
2	1	0.872896	1	0.741399	1	0.815563	0.899655	0.776778	0.73658	0.790919	0.860281	0.913786	1	0.7245	0.879896	0.946286	0.809445	0.881332	0.800588	0.776788	0.893549	0.821551	0.890459	0.92528	0.773588
4	0.945409	0.857311	0.892508	0.436969	0.579536	0.849531	0.730156	0.7796	0.977216	0.802929	0.951587	0.736453	0.738279	0.909405	1	0.919646	0.720685	0.877633	0.758003	0.872154	0.852776	0.85011	0.880028	0.866262	0.601462
6	0.733551	1	0.840931	0.60862	0.582688	0.744509	0.758862	0.797916	0.932605	0.749621	0.92995	0.84582	0.846605	1	0.872433	0.903311	0.754121	0.857541	0.849919	0.966675	0.886976	0.847918	0.869597	0.843927	0.948084
8	0.95603	0.766736	0.904813	0.783504	0.716538	0.844309	0.736897	0.904119	0.797337	0.961842	0.806364	0.625618	0.769679	0.618228	0.905119	0.888267	0.629986	0.889989	0.833062	1	0.951759	0.981399	0.886594	0.873967	0.756786
10	0.888748	0.80034	0.87188	0.91803	0.722843	0.892366	0.727409	1	0.788327	0.967067	0.931917	0.729564	0.860035	0.67614	0.844	1	0.806593	0.877932	0.903038	0.873023	0.741569	0.899232	0.816926	0.690769	0.741061
12	0.956625	0.872415	0.817408	1	0.412593	0.968642	0.645286	0.548404	0.695776	0.930489	0.844149	0.660087	0.969269	0.726888	0.830851	0.735283	0.716938	0.848884	0.646292	0.871297	0.723675	0.963454	0.72388	0.586278	0.702716
14	0.671872	0.691991	0.764388	0.749623	0.594219	0.889228	0.70644	0.746699	0.622202	0.561947	0.812661	0.552211	0.919202	0.686506	0.727791	0.717234	0.585605	0.782444	0.975547	0.791725	0.828765	0.844747	0.849237	0.541084	0.778537
16	0.694303	0.836132	0.695619	0.732432	0.405781	1	0.671245	0.813903	0.569518	0.618921	0.837074	0.441872	0.79107	0.791183	0.780388	0.828534	0.578257	0.822316	0.863836	0.51738	0.821298	0.865536	0.882382	0.667106	0.794479
18	0.80289	0.831745	0.837861	0.930492	0.528606	0.668759	0.711431	0.802633	0.742281	0.732891	0.691851	0.352202	0.817251	0.655151	0.567881	0.715944	0.604345	0.7704	0.986932	0.870429	0.695811	0.772644	0.822148	0.571124	0.700554
20	0.697847	0.806424	0.759318	0.856998	0.714443	0.902811	0.569893	0.563898	0.679152	0.714581	0.377008	0.440382	0.806775	0.613709	0.828716	0.680279	0.537328	0.844562	0.535413	0.542947	0.63919	0.803717	0.585399	0.547997	0.842523
22	0.57745	0.698801	0.90029	0.799199	0.613643	0.857892	0.553423	0.734482	0.927861	0.810767	0.540331	0.263547	0.936952	0.574387	0.857507	0.910829	0.739727	0.565823	0.71333	0.598678	0.877691	0.845514	0.618042	0.575379	0.691081
24	0.879602	0.665208	0.685853	0.581959	0.660361	0.98747	0.604848	0.404603	0.588993	0.414539	0.655256	0.461569	0.786071	0.694473	0.881313	0.669747	0.551873	0.563967	0.756321	0.673653	0.803851	0.793979	0.651689	0.72933	0.833692
26	0.548537	0.649377	0.421647	0.419527	0.472959	0.785785	0.659765	0.891902	0.788327	0.281753	0.917355	0.418224	0.857301	0.569076	0.891254	0.667383	0.510793	0.689125	0.801013	0.614182	0.747458	0.734352	0.614	0.667374	0.6355
28	0.645611	0.737273	0.486251	0.205531	0.524924	0.815563	0.620574	0.484023	0.419559	0.554109	0.737901	0.839406	0.901223	0.726085	0.787493	0.697254	0.541081	0.796968	0.869732	0.585743	0.775093	0.661376	0.709576	0.637859	0.83951
30	0.550309	0.643783	0.45078	0.301448	0.594748	0.855807	0.450572	0.5592	0.838161	0.670165	0.537967	0.41872	0.799721	0.625403	0.93106	0.738288	0.406146	0.74474	0.827573	0.427746	0.568974	0.702076	0.537102	0.727733	0.537693
32	0.557386	0.561727	0.538367	0.415299	0.411028	0.794145	0.586867	0.569069	0.462734	0.649768	0.489967	0.547783	0.784934	0.537721	0.777896	0.674476	0.392205	0.526575	0.768132	0.410504	0.770108	0.714005	0.816085	0.592397	0.652085
34	0.508409	0.635255	0.407891	0.281767	0.538594	0.735117	0.570397	0.564371	0.74561	0.477792	0.607636	0.588666	0.798813	0.65861	0.93391	0.738081	0.409143	0.613106	0.505489	0.441537	0.672257	0.63698	0.604071	0.568198	0.573025
36	0.590735	0.986603	0.504165	0.146486	0.558525	0.569485	0.664252	0.804508	0.738952	0.579709	0.700116	0.583742	0.63996	0.578371	0.919328	0.807696	0.398048	0.551611	0.71248	0.567078	0.847344	0.770567	0.525661	0.501195	0.497195
38	0.387131	0.765273	0.37568	0.024662	0.498159	0.718395	0.54643	0.845383	0.55387	0.585461	0.627306	0.374382	0.521617	0.55553	0.973	0.695963	0.216044	0.637208	0.609197	0.411083	0.662288	0.57341	0.506141	0.47541	0.527786
40	0.397467	0.742151	0.644225	0.22471	0.530194	0.819754	0.430851	0.518799	0.616501	0.629372	0.797719	0.252209	0.876648	0.476885	0.71606	0.706278	0.423538	0.505562	0.42117	0.432343	0.755154	0.697591	0.556622	0.666581	0.392503
42	0.497788	0.862669	0.680061	0.334083	0.61523	0.69384	0.232908	0.747173	0.501186	0.532681	0.580083	0.369458	0.845697	0.512224	0.648552	0.849164	0.331635	0.242579	0.80312	0.552129	0.625596	0.50361	0.506481	0.520347	0.514866
44	0.498965	0.642556	0.677523	0.271052	0.572172	0.578877	0.377685	0.673871	0.555285	0.363822	0.576149	0.281774	0.875051	0.641337	0.739522	0.779115	0.248574	0.228977	0.728079	0.355642	0.548359	0.607985	0.531887	0.484444	0.440972
46	0.233991	0.791575	0.735612	0.246641	0.502877	0.677119	0.327759	0.451596	0.555764	0.722946	0.690661	0.208367	0.72894	0.55101	0.808104	0.698752	0.189503	0.50185	0.530774	0.351335	0.742701	0.541465	0.502947	0.421964	0.48233
48	0.371789	0.58583	0.513027	0.385898	0.555372	0.785785	0.493515	0.541812	0.739909	0.715634	0.465554	0.447789	0.830222	0.595644	0.721746	0.765795	0.183956	0.324166	0.470908	0.197066	0.665008	0.59606	0.485449	0.309231	0.444419
50	0.30452	0.511812	0.5	0.506979	0.29658	0.688596	0.324761	0.523497	0.554807	0.438053	0.444314	0.382761	0.730766	0.446334	0.727433	0.631718	0.161319	0.487637	0.568295	0.465378	0.851873	0.601639	0.378092	0.225209	0.660915
52	0.422253	0.43	0.487877	0.298204	0.407346	0.357354	0.392667	0.498115	0.514462	0.571871	0.570645	0.118718	0.805408	0.390542	0.763687	0.628279	0.229986	0.512973	0.657678	0.243602	0.780525	0.660282	0.38617	0.248604	0.672551
54	0.272348	0.536641	0.423456	0.3697	0.432546	0.636874	0.417871	0.503286	0.68866	0.703098	0.560413	0.520204	0.748057	0.427209	0.532343	0.683067	0.293552	0.385972	0.509278	0.255378	0.650739	0.528336	0.350163	0.1925	0.434512
56	0.185014	0.317755	0.567317	0.474836	0.373239	0.624344	0.387666	0.279136	0.405785	0.681143	0.584017	0.424617	0.747149	0.477153	0.673776	0.856474	0.455922	0.350435	0.28667	0.363401	0.616311	0.517505	0.391053	0.298064	0.505601
58	0.282088	0.38934	0.609484	0.499006	0.274026	0.789976	0.224416	0.276788	0.356908	0.419237	0.634	0.286202	0.839551	0.73008	0.592045	0.685865	0.45727	0.356925	0.530774	0.357078	0.698076	0.500655	0.502106	0.168044	0.306332
60	0.117733	0.515462	0.605684	0.51694	0.506559	0.827588	0.160011	0.550753	0.607013	0.639845	0.473818	0.397037	0.565089	0.470514	0.527015	0.618605	0.284107	0.291095	0.442666	0.287557	0.626052	0.453389	0.470975	0.084826	0.437959
62	0.117733	0.574141	0.678792	0.347529	0.338581	0.621733	0.167004	0.459589	0.465107	0.708828	0.492314	0.360582	0.503866	0.556322	0.498582	0.681777	0.49745	0.324776	0.327573	0.192179	0.779849	0.447484	0.361936	0.118328	0.323993
64	0.115676	0.414906	0.918569	0.30692	0.296073	0.650984	0.185477	0.370774	0.436642	0.43858	0.697752	0.165518	0.349793	0.47529	0.436388	0.54297	0.465966	0.421509	0.212905	0.238716	0.678821	0.494088	0.403498	0.223612	0.175356
66	0.187667	0.426349	0.939197	0.305926	0.477699	0.807202	0.272843	0.487299	0.428569	0.457396	0.587174	0.299009	0.487024	0.2415	0.518119	0.620329	0.642724	0.35908	0.403871	0.245038	0.62356	0.517832	0.28858	0.186124	0.136794
68	0.355851	0.397859	0.692906	0.526409	0.416275	0.721007	0.411382	0.422464	0.431419	0.387358	0.638727	0.204436	0.297671	0.471842	0.552597	0.730771	0.422335	0.453957	0.325891	0.16	0.621296	0.371332	0.368502	0.199681	0.392286
70	0.118625	0.284397	0.667574	0.456399	0.124942	0.583068	0.43061	0.475556	0.26055	0.463675	0.578512	0.038421	0.188885	0.353608	0.624731	0.674476	0.550671	0.408841	0.214162	0.243023	0.515968	0.38884	0.33653	0.267488	0.366436
72	0.219244	0.350377	0.853419	0.354256	0.330181	0.607623	0.31328	0.334103	0.313712	0.504446	0.572215	0.0531935	0.276279	0.409668	0.606612	0.697037	0.585605	0.409763	0.0168567	0.0660706	0.467052	0.329976	0.162375	0.252066	0.273588
74	0.221896	0.380811	0.61238	0.242153	0.237802	0.645762	0.535453	0.395662	0.2933	0.493468	0.666264	0	0.303587	0.312702	0.525239	0.646112	0.3925	0.526575	0.322509	0.271474	0.447569	0.381506	0.189972	0.241424	0.245802
76	0.482743	0.337717	0.514844	0.365222	0.38951	0.545457	0.458068	0.489194	0.41623	0.0590599	0.702479	0.119215	0.184794	0.355204	0.465179	0.491837	0.362219	0.57108	0.272346	0	0.620164	0.373409	0.384989	0.0491915	0.350494
78	0.445267	0.357198	0.777232	0.0685138	0.311286	0.240855	0.312788	0.289478	0.19174	0.370628	0.568281	0.0448141	0.331355	0.39187	0.479746	0.42243	0.300447	0.364336	0.444773	0.101121	0.525262	0.442232	0.1893	0	0.192592
80	0.418411	0.222793	0.666852	0.0849517	0.27978	0.464989	0.328262	0.498115	0.312297	0.429161	0.404959	0.0349658	0.197765	0.349625	0.464463	0.459818	0.415289	0.288629	0.241572	0	0.577584	0.410722	0.073364	0.0321727	0.299872
82	0.419886	0.542736	0.50887	0.464372	0.197897	0.577319	0.450079	0.179979	0.357845	0.472567	0.292397	0.0852213	0.250566	0.359455	0.489343	0.565108	0.637032	0.476826	0.400506	0.0333128	0.438513	0.321443	0.13983	0.124168	0.389056
84	0.375036	0.43268	0.296241	0.222973	0.329651	0.701674	0.378189	0.337873	0.220683	0.346565	0.541901	0.0798005	0.247383	0.335018	0.40903	0.433819	0.4916	0.224967	0.360454	0	0.398643	0.298467	0.0980989	0.141723	0.289955
86	0.460609	0.242509	0.35614	0	0.135437	0.485374	0.702194	0.281011	0.109155	0.348146	0.438017	0	0.16454	0.302603	0.511015	0.383967	0.447976	0.242891	0.19688	0.00659982	0.385963	0.361485	0.129901	0.0739157	0.246227
88	0.51401	0.440953	0.207749	0.105135	0.353815	0.51829	0.563162	0.166341	0.213567	0.214328	0.284529	0.119215	0.333859	0.316953	0.277537	0.485394	0.386059	0.26637	0.308184	0	0.497627	0.306779	0.17836	0	0.194528
90	0.512535	0.448991	0.36301	0.201795	0.0325418	0.475961	0.390916	0.376399	0.270516	0.572925	0.605669	0	0.169549	0.33581	0.339373	0.344223	0.491902	0.062728	0	0	0.383014	0.325817	0.16894	0.0803033	0.364708
92	0.178223	0.786462	0.198522	0	0.212602	0.524544	0.305795	0.333649	0.139056	0.588601	0.344744	0.132022	0.320429	0.234058	0.305612	0.276106	0.239129	0.245357	0	0	0.701025	0.267941	0.558813	0.107685	0.769489
94	0.199465	0.570736	0.0325753	0	0.218379	0.255469	0.359967	0.187499	0.259613	0.445891	0.456512	0.132497	0.296992	0.197135	0.414716	0.354105	0.264618	0	0	0	0.437828	0.334134	0.111053	0.165654	0.309779
96	0.366484	0.301434	0.0342018	0.065019	0.280839	0.134779	0.481532	0.238716	0.185102	0.362263	0.518298	0.211326	0.197087	0.394794	0.135403	0.521059	0.349323	0.105066	0.218801	0	0.363759	0.311816	0.096417	0.300721	0.296641
98	0.378283	0.296321	0.13699	0.175135	0.343299	0.462377	0.479037	0.156473	0.159467	0.467319	0.173157	0.189643	0.239412	0.177206	0.529493	0.399011	0.381261	0.217244	0	0	0.342926	0.335338	0.0161555	0.111415	0.228131
100	0.280911	0.260774	0.224037	0.217742	0.133342	0.297799	0.491765	0.176683	0.280962	0.485103	0.259339	0.0463038	0.175465	0.202178	0.286776	0.399011	0.230735	0.101354	0	0	0.281091	0.289823	0.262155	0.104491	0.103398
102	0.373561	0.252981	0.457111	0.0139476	0.293428	0.42685	0.397658	0.15367	0.261507	0.567172	0.131041	0	0.144964	0.264341	0.291403	0.325524	0.229236	0.0747725	0.100751	0	0.352667	0.306127	0.0198587	0.243557	0.298361
104	0.331065	0.163142	0.578178	0.198311	0.184779	0.310329	0.467053	0.0343024	0.270058	0.32933	0.425818	0	0.121527	0.197135	0.447403	0.345721	0.209748	0.0370813	0.0585913	0	0.409289	0.271442	0.330982	0.286896	0
106	0.34818	0.233991	0.403369	0.246882	0.268757	0.282636	0.298309	0.0187893	0.165168	0.426021	0.0905124	0.245815	0.220065	0.0956382	0.346134	0.215939	0.275411	0.186029	0.0050641	0	0.458671	0.290696	0.32711	0.291944	0.0771235
108	0.36294	0.182858	0.430874	0.0520655	0.197897	0.433126	0.334501	0.0921112	0.238244	0.428656	0.224711	0.306892	0.112647	0.293041	0.273985	0.244736	0.210793	0.0877516	0.080937	0	0.254816	0.194092	0	0.334491	0.297067
110	0.285633	0.271971	0.403004	0.0959172	0.255639	0.37774	0.343486	0	0.163255	0.391003	0.0594215	0.280781	0	0.204566	0.433552	0.3165	0.122341	0.110621	0.166938	0	0.0824494	0.182383	0	0.300185	0.261735
112	0.266449	0.345264	0.303841	0	0.235179	0.297799	0.459567	0.0056447	0.198856	0.398841	0.29043	0.181284	0.0152458	0.204298	0.32197	0.498931	0.209445	0.145548	0	0	0.286076	0.177788	0	0.444566	0.158979
114	0.240783	0.192839	0.199427	0.0901833	0.303944	0.221522	0.335748	0	0.236829	0.422377	0.0826446	0.10049	0	0.186501	0.337955	0.328105	0.187557	0.0308902	0.0354133	0.172356	0.341109	0.327678	0	0.0709899	0.0863794
116	0.351724	0.124179	0.110935	0	0.123355	0.231441	0.337751	0.0958612	0.256762	0.410345	0.14286	0.0526969	0	0.214129	0.461627	0.292648	0.177659	0.0176126	0.395017	0.501575	0.559233	0.284134	0	0.0850829	0.100385
118	0.284456	0.195273	0.20648	0.110859	0.160637	0.0438876	0.361707	0.0681311	0.064066	0.249347	0.162529	0.244822	0	0.193943	0.409746	0.39106	0.194755	0.0874531	0.143335	0.281524	0.358784	0.287852	0	0.0156899	0.191515
120	0.219826	0.0905753	0.240864	0.107375	0.188968	0.203221	0.498506	0.028184	0.122929	0.515424	0.153868	0.100987	0.0166127	0.238844	0.30206	0.696821	0.187104	0.105676	0.0080034	0.313413	0.412456	0.194307	0	0.159267	0.153161
122	0.377403	0.264179	0.228924	0.17863	0.299733	0.349521	0.554419	0	0.0370164	0.320438	0.0952397	0.289657	0	0.27444	0.457358	0.613669	0.149474	0.147404	0.199412	0.116335	0.253009	0.25864	0	0	0.119341
124	0.0542935	0.219142	0.0367403	0	0.0965893	0.288385	0.369445	0	0.0441326	0.473599	0.029124	0.0709246	0	0.154353	0.117985	0.80017	0.0707638	0.247524	0.214162	0.0878971	0.382338	0.160501	0	0.0255282	0.0896185
126	0.0669839	0.0377457	0.0343842	0	0.233591	0.131663	0.155272	0	0	0.205963	0.00471074	0.465024	0.0229786	0.195807	0.346836	0.406528	0.236282	0	0.148399	0	0.374404	0.199996	0	0.0255282	0.14196
128	0.0994411	0.168255	0.0866826	0	0.21785	0.22308	0.422872	0.0986836	0	0.297429	0	0.0827592	0.0584884	0.198195	0.548328	0.3165	0.159222	0	0.0139174	0.0135013	0.27701	0.173519	0	0.115134	0.307191
130	0.0764274	0.0477267	0.0387316	0	0.165884	0.350574	0.469548	0.0234867	0.151873	0.410345	0.0743802	0.134484	0.0366377	0.254254	0.526657	0.461749	0.198048	0.262048	0.0080034	0.0973806	0.290832	0.246936	0	0.141187	0.0208914
132	0.00294952	0.0263023	0.0834296	0	0.12126	0.125913	0.587119	0	0.0474615	0.137484	0.140099	0.188174	0	0.164987	0.236672	0.454232	0.153523	0.0395473	0.055227	0.00918184	0.271121	0.109843	0.0163251	0.266952	0.0512739
134	0.0466223	0.111519	0.0521235	0	0.162731	0.205328	0.221921	0.0117433	0.0958598	0.494522	0.110182	0.137918	0	0.205637	0.120119	0.336056	0.144827	0.136579	0.147974	0	0.299213	0.0105	0	0.0888127	0.199269
136	0	0	0.140433	0	0.134908	0.241886	0.228159	0.109026	0.168956	0.525874	0.204248	0	0.039142	0	0.195448	0.307475	0.187557	0.139979	0.146292	0	0.254816	0.145842	0	0.21192	0.0807788
138	0	0.188943	0.00272094	0	0.0188945	0.238748	0.242134	0.198295	0.0711823	0.209103	0	0	0.103777	0	0.192254	0.293081	0.120238	0.236713	0.4844	0	0.31393	0.144091	0	0.169373	0.0394213
140	0.127474	0.239349	0	0	0.153273	0.333326	0.218178	0.0667298	0	0.198125	0.0279339	0.014276	0.126755	0	0.224239	0.211219	0.161772	0.152349	0.191816	0	0.354703	0.206342	0	0.198352	0
142	0.045445	0.264424	0	0.195068	0.0650837	0.0219438	0.275338	0.120295	0	0	0.138926	0	0.123123	0	0.358209	0.17791	0.184705	0.145548	0.43213	0	0.396151	0.170569	0	0.0359025	0.0336036
144	0	0.304358	0	0	0.162202	0.326019	0.218429	0	0.142384	0.129624	0.192826	0.210829	0.154752	0.00584697	0.160269	0.27847	0.155771	0.232066	0.0708266	0	0.361276	0.0455107	0	0.178675	0.0226195
146	0	0.234481	0.0510367	0.0528188	0.182684	0.220469	0.280328	0	0.055993	0.302654	0.0334545	0.0398899	0.171135	0.0140818	0.0639702	0.205633	0.101499	0.306242	0.0792549	0.0298742	0.342926	0.0510939	0	0.0523853	0.0353317
148	0.078497	0.293887	0.0712994	0	0.0477765	0.179193	0.0921148	0	0.0147109	0.238896	0	0.176339	0.174328	0	0.095597	0.274174	0.022486	0.0889976	0.0889581	0	0.224688	0.0329291	0	0	0.0191723
150	0.126297	0.0893584	0	0	0.0225765	0.00625398	0.172739	0	0.189368	0.186093	0.0255702	0.226595	0.0860264	0	0.209672	0.114097	0.0154398	0.0596389	0.157678	0	0.275431	0.068381	0	0	0.0801364
152	0	0.0818113	0.0481409	0	0	0.342213	0.203196	0	0	0.400422	0.0106281	0	0.00932909	0	0.0625522	0.237427	0.168963	0.0290472	0.0560769	0	0.242363	0.0978086	0	0.00186492	0
154	0	0.145849	0.0197306	0	0	0.129029	0.190468	0	0.0184982	0.311546	0	0.204436	0.142011	0	0.109448	0.237427	0.209294	0.0287357	0	0	0.419705	0.0666302	0	0.0231384	0.0887499
156	0.0599075	0.327736	0.133919	0	0	0.071054	0.200197	0	0.123866	0.22008	0	0.117228	0.0302622	0	0.126507	0.0848758	0.107644	0.074474	0.135332	0	0.352895	0.0812889	0	0	0.026492
158	0.18354	0.223273	0	0.0677604	0	0.250247	0.212935	0	0.0944446	0.210135	0	0.0911179	0.0505166	0	0	0.274815	0.108545	0.143692	0	0	0.37645	0.0676136	0	0	0
160	0.0483945	0.145358	0.0104961	0	0.0241418	0.0919444	0.283578	0	0	0.127012	0.166066	0	0.0145576	0	0.293537	0.289209	0.0953529	0.116189	0	0	0.217439	0.0316195	0	0	0.101037
162	0	0.366688	0	0	0	0.00522262	0	0	0.0987103	0.0810152	0.0539174	0.105911	0	0	0.0810299	0.101851	0.0497765	0.0760185	0.140378	0	0.389815	0	0	0.0220776	0.100168
164	0	0.118821	0.00199131	0	0.0934365	0	0.131053	0.2594	0.0982319	0.0956594	0.0173058	0.145801	0	0.0696058	0.113716	0.140954	0.0170896	0	0	0	0.383698	0.00218731	0	0.0813642	0.00560059
166	0	0.123934	0	0	0.327028	0.0360317	0.153521	0	0	0.145849	0.125934	0.0315106	0	0.23061	0.237746	0.177052	0	0	0	0	0.154254	0.054044	0	0	0
168	0	0.21183	0	0	0.111295	0.351605	0.304799	0	0.0564714	0.113421	0.113736	0.0492624	0.0710005	0.312434	0	0.161368	0.0731629	0	0.0244529	0	0.113024	0.106342	0	0	0
170	0	0.161915	0	0	0	0	0.131053	0	0.044611	0.145849	0.214083	0.18176	0.0193368	0.163124	0.00923881	0.121398	0.0539702	0	0.0817869	0	0.129111	0.0935442	0	0.124168	0
172	0	0.386415	0	0	0.186873	0.0543328	0.157264	0.0921112	0.158989	0.123894	0	0	0.00227492	0.172954	0.437806	0.222816	0.0563693	0	0	0	0.190717	0.0760366	0	0	0.0336036
174	0	0.146095	0.072751	0.0256665	0.132284	0	0.166501	0	0	0.357038	0.121603	0.0482693	0.0329959	0.0350707	0.0995075	0.215939	0.0551729	0	0	0	0.283355	0.00229759	0	0	0
176	0	0	0.00253853	0.0254154	0	0	0.0621612	0	0	0.0224823	0.0885454	0.027083	0.0445999	0.0536605	0	0.175545	0	0.0426363	0	0	0.347454	0.141463	0	0	0
178	0	0	0.0177393	0	0.0346363	0	0.0639016	0	0.0522056	0	0.0586281	0	0	0	0.0867164	0.105073	0.126384	0	0	0	0.0953586	0.0687072	0	0	0.0284373
180	0	0.0182644	0.183496	0	0.0866239	0.22466	0.210189	0	0.0379732	0.0684787	0.133802	0.188174	0	0	0.0444179	0.160077	0.0547258	0.13628	0	0	0.0935511	0.0184864	0	0	0
One phase decay
Best-fit values
Y0	0.9183
Plateau	2.106e-11
K	0.01281
Half Life	54.1
Tau	78.05
Span	0.9183
Goodness of Fit
Degrees of Freedom	2272
R squared	0.7262
Sum of Squares	49.26
Sy.x	0.1472
Constraints
Plateau	Plateau > 0
K	K > 0
Number of points
# of X values	2730
# Y values analyzed	2275

## Sheet: Fig. 2C-D
Duty cycle analysis
	Ctrl dsRNA																														dMiro dsRNA
Long run	8.86525	40.5348	33.2643	12.399	17.5396	20.0258	5.12059	27.1591	38.7962	19.1492	24.2424	23.6256	27.4239	31.9775	53.6458	33.1312	30.7143	35.9091	78.3154	28.3086	19.697	53.6247	26.9697	40.3273	21.5152	12.5477	23.4901	37.3464	8.60606		14.5455	5.71429	0	28.118	23.2143	0	0	4.54545	8.87583	6.54127	10.5263	2.47934	23.4002	11.2763	12.0455	6.36364	0.568182	11.2748	15.7576
Short run	47.8014	53.9093	50.9695	55.3283	50.5723	44.8227	49.6846	44.697	53.3963	43.5278	47.8788	48.7233	57.7817	53.9178	39.5833	13.5555	54.6429	50.4545	21.6846	40.6281	65.1515	32.7782	56.9697	43.6007	63.3333	74.927	38.1818	46.3194	55.0303		70.9091	36.8831	18.1818	55.311	17.8571	36.7677	0.535714	71.3636	28.14	11.55	36.4446	33.2231	43.3058	43.635	23.6364	67.4662	32.7273	40.2761	40.303
Pause	43.3333	5.55591	15.7662	32.2727	31.8881	35.1515	45.1948	28.1439	7.80749	37.323	27.8788	27.651	14.7944	14.1047	6.77083	53.3133	14.6429	13.6364	0	31.0633	15.1515	13.597	16.0606	16.0719	15.1515	12.5253	38.3281	16.3342	36.3636		14.5455	57.4026	81.8182	16.571	58.9286	63.2323	99.4643	24.0909	62.9841	81.9087	53.0291	64.2975	33.294	45.0887	64.3182	26.1702	66.7045	48.4491	43.9394
				Discovery?	P value	Mean of Ctrl dsRNA	Mean of dMiro dsRNA	Difference	SE of difference	t ratio	df	q value
Test details			Long run	Yes	<0.000001	28.77	10.94	17.83	3.09	5.771	63	<0.000001
Test name	Unpaired t test		Short run	No	0.104359	48.27	41.79	6.479	3.932	1.648	63	0.035134
Variance assumption	Individual variance for each row		Pause	Yes	2e-06	22.96	47.27	-24.31	4.611	5.272	63	<0.000001
Multiple comparisons	False Discovery Rate (FDR)
Method	Two-stage step-up (Benjamini, Krieger, and Yekutieli)
Desired FDR (Q)	1.00%
Number of tests performed	3
Number of rows omitted	0
Motility analysis
Ctrl dsRNA	Miro dsRNA			Mann Whitney test
0	100			P value	<0.0001
100	33.3333			Exact or approximate P value?	Exact
0	0			P value summary	****
0	0			Significantly different (P < 0.05)?	Yes
100	0			One- or two-tailed P value?	Two-tailed
100	100			Sum of ranks in column A,B	8190 , 6861
100	100			Mann-Whitney U	2490
50	100
100	0			Difference between medians
50	0			Median of column A	81.67, n=80
100	0			Median of column B	33.33, n=93
66.6667	0			Difference: Actual	-48.33
66.6667	0			Difference: Hodges-Lehmann	-30
100	100
40	0
33.3333	0
100	66.6667
50	0
0	50
66.6667	0
100	0
100	100
0	50
100	100
71.4286	0
87.5	100
50	0
100	36.3636
22.2222	100
100	9.09091
0	60
100	100
0	0
75	100
25	33.3333
100	50
83.3333	100
50	0
85.7143	33.3333
85.7143	100
85.7143	100
50	0
100	100
100	0
100	25
60	0
100	0
100	0
100	0
0	33.3333
100	100
100	50
66.6667	100
100	100
100	66.6667
33.3333	50
100	33.3333
40	50
100	0
66.6667	50
0	100
100	100
100	33.3333
100	25
100	71.4286
50	100
60	100
100	37.5
100	33.3333
75	0
50	0
80	100
0	33.3333
33.3333	100
100	50
100	50
80	0
33.3333	0
75	33.3333
20	0
	100
	25
	0
	0
	50
	57.1429
	33.3333
	100
	20
	100
	20
	0
	0
[truncated: 17 more columns]

## Sheet: Fig. 2F
Duty cycle analysis (561-nm)
	Long runs																	Short runs																	Pauses
Control	38.5642	33.8797	11.8958	28.0149	61.5925	15.9842	26.4597	15.9505	34.7104	16.1819	21.5524	20.4562	19.9414	3.69919	8.74777	10.6278		24.2898	23.8488	65.5786	24.7289	22.7416	20.3645	35.7914	21.7519	25.3661	34.288	24.2044	25.195	13.4347	29.0085	37.3115	18.9286		37.1459	42.2715	22.5256	47.2562	15.6659	63.6514	37.7489	62.2975	39.9235	49.5301	54.2432	54.3488	66.6239	67.2923	53.9408
wt-Miro	66.1196	72.8066	81.3115	58.6298	73.4001	78.8501	60.3499	82.312	58.768	74.7573	73.7733	57.4439	57.1392	81.1589	35.5844			15.939	19.1112	13.6074	29.3329	12.5335	10.5129	18.0741	9.67226	11.9638	6.87091	6.0133	14.1381	15.8992	1.22368	27.0188			17.9414	8.08216	5.08104	12.0373	14.0664	10.637	21.576	8.01578	29.2682	18.3718	20.2134	28.418	26.9616	17.6174	37.3968
Split-Miro	76.4226	48.0367	100	71.5241	66.7803	50.6496	77.6568	64.1004	68.521	53.7765	36.096	88.5776	26.9863	71.1078	58.6878			16.7079	40.6049	0	18.9163	14.98	15.9561	13.1604	13.9744	15.9827	17.0072	22.8535	8.5246	43.7637	12.9116	13.1773			6.86957	11.3585	0	9.55962	18.2397	33.3943	9.1828	21.9252	15.4963	29.2163	41.0505	2.89779	29.25	15.9806	28.1348
ANOVA summary (long runs)
F	39.35					Tukey's multiple comparisons test	Mean Diff.	95.00% CI of diff.	Below threshold?	Summary	Adjusted P Value
P value	<0.0001					Control vs. wt-Miro	-44.48	-58.07 to -30.88	Yes	****	<0.0001	A-B
P value summary	****					Control vs. Split-Miro	-40.91	-54.51 to -27.31	Yes	****	<0.0001	A-C
Significant diff. among means (P < 0.05)?	Yes					wt-Miro vs. Split-Miro	3.565	-10.25 to 17.38	No	ns	0.8064	B-C
R squared	0.6467
						Test details	Mean 1	Mean 2	Mean Diff.	SE of diff.	n1	n2	q	DF
Brown-Forsythe test						Control vs. wt-Miro	23.02	67.49	-44.48	5.602	16	15	11.23	43
F (DFn, DFd)	0.8078 (2, 43)					Control vs. Split-Miro	23.02	63.93	-40.91	5.602	16	15	10.33	43
P value	0.4525					wt-Miro vs. Split-Miro	67.49	63.93	3.565	5.691	15	15	0.886	43
P value summary	ns
Are SDs significantly different (P < 0.05)?	No
Bartlett's test
Bartlett's statistic (corrected)	2.381
P value	0.3041
P value summary	ns
Are SDs significantly different (P < 0.05)?	No
ANOVA table	SS	DF	MS	F (DFn, DFd)	P value
Treatment (between columns)	19116	2	9558	F (2, 43) = 39.35	P<0.0001
Residual (within columns)	10446	43	242.9
Total	29562	45
ANOVA summary (short runs)
F	7.45					Tukey's multiple comparisons test	Mean Diff.	95.00% CI of diff.	Below threshold?	Summary	Adjusted P Value
P value	0.0017					Control vs. wt-Miro	13.8	4.794 to 22.80	Yes	**	0.0016	A-B
P value summary	**					Control vs. Split-Miro	10.03	1.020 to 19.03	Yes	*	0.026	A-C
Significant diff. among means (P < 0.05)?	Yes					wt-Miro vs. Split-Miro	-3.774	-12.92 to 5.375	No	ns	0.5801	B-C
R squared	0.2573
						Test details	Mean 1	Mean 2	Mean Diff.	SE of diff.	n1	n2	q	DF
Brown-Forsythe test						Control vs. wt-Miro	27.93	14.13	13.8	3.71	16	15	5.261	43
F (DFn, DFd)	0.1208 (2, 43)					Control vs. Split-Miro	27.93	17.9	10.03	3.71	16	15	3.822	43
P value	0.8865					wt-Miro vs. Split-Miro	14.13	17.9	-3.774	3.769	15	15	1.416	43
P value summary	ns
Are SDs significantly different (P < 0.05)?	No
Bartlett's test
Bartlett's statistic (corrected)	3.134
P value	0.2087
P value summary	ns
Are SDs significantly different (P < 0.05)?	No
ANOVA table	SS	DF	MS	F (DFn, DFd)	P value
Treatment (between columns)	1588	2	793.8	F (2, 43) = 7.450	P=0.0017
Residual (within columns)	4582	43	106.5
Total	6169	45
ANOVA summary (pauses)
F	30.44					Tukey's multiple comparisons test	Mean Diff.	95.00% CI of diff.	Below threshold?	Summary	Adjusted P Value
P value	<0.0001					Control vs. wt-Miro	30.68	19.56 to 41.80	Yes	****	<0.0001	A-B
P value summary	****					Control vs. Split-Miro	30.89	19.77 to 42.00	Yes	****	<0.0001	A-C
Significant diff. among means (P < 0.05)?	Yes					wt-Miro vs. Split-Miro	0.2086	-11.09 to 11.50	No	ns	0.9989	B-C
R squared	0.5861
						Test details	Mean 1	Mean 2	Mean Diff.	SE of diff.	n1	n2	q	DF
Brown-Forsythe test						Control vs. wt-Miro	49.06	18.38	30.68	4.58	16	15	9.473	43
F (DFn, DFd)	1.990 (2, 43)					Control vs. Split-Miro	49.06	18.17	30.89	4.58	16	15	9.537	43
P value	0.1491					wt-Miro vs. Split-Miro	18.38	18.17	0.2086	4.653	15	15	0.06339	43
P value summary	ns
Are SDs significantly different (P < 0.05)?	No
Bartlett's test
Bartlett's statistic (corrected)	4.128
P value	0.127
P value summary	ns
Are SDs significantly different (P < 0.05)?	No
ANOVA table	SS	DF	MS	F (DFn, DFd)	P value
Treatment (between columns)	9888	2	4944	F (2, 43) = 30.44	P<0.0001
Residual (within columns)	6983	43	162.4
Total	16871	45
Duty cycle analysis (488-nm)
	Long runs																		Short runs																		Pauses
Blue light 1st min (Miro)	72.4343	60.3643	56.4431	44.1707	38.1207	79.6292	87.0951	48.9948	63.6845	81	65.2746								16.7592	26.291	22.3225	24.133	31.6212	8.87592	8.78788	23.1716	9.08563	8.14067	13.4786								10.8064	13.3447	21.2345	31.6962	30.2581	11.4949	4.11706	27.8336	27.2298	10.8593	21.2467
Blue light 7th min (Miro)	66.2075	52.8935	51.2434	62.7823	37.0767	74.2533	89.0351	35.0963	62.7728	61.7173	52.1002								19.9109	27.4672	30.1936	17.4893	19.9139	15.7861	0.409836	30.1034	19.7196	13.6465	18.2117								13.8817	19.6392	18.563	19.7284	43.0093	9.96061	10.5551	34.8003	17.5076	24.6362	29.6881
Blue light 1st min (Split-Miro)	36.8465	30.0546	67.8616	44	63.9491	37.9818	66.7857	54.5488	57.0274	50.4318	50.2771	42.9921	39.1717	50.7601	68.9283	63.0611	50.7821		24.4674	34.153	19.4486	18.2295	14.5839	35.6309	17.996	14.3498	12.6367	29.9366	15.5768	20.0752	28.2516	34.7118	19.6325	23.5837	26.2103		38.686	35.7923	12.6897	37.7705	21.467	26.3873	15.2183	31.1014	30.3359	19.6316	34.1461	36.9327	32.5767
Blue light 7th min (Split-Miro)	17.1682	23.75	50.2419	36.1051	4.86275	21.257	63.2892	0	42.2667	31.4689	5.08531	71.0714	38.4188	9.09091	40.6562	9.28962	71.4994		25.2274	27.4795	27.5591	31.7849	56.0488	25.9808	20.2312	29.224	30.7494	33.0455	11.3639	10.24	25.6466	81.8182	34.9094	48.6339	7.5822		57.6044	48.7705	22.1989	32.11	39.0884	52.7622	16.4796	70.776	26.9839	35.4857	83.5508	18.6885	35.9346
Test name	Paired t test (Miro)			Below threshold?	P value	Mean of Blue light 1st min	Mean of Blue light 7th min	Difference	SE of difference	t ratio	df	Adjusted P Value
Variance assumption	Individual variance for each group		Long run	No	0.146849	63.38	58.65	4.73	3.008	1.573	10	0.37902
Multiple comparisons	Set P value threshold		Short run	No	0.43067	17.52	19.35	-1.835	2.234	0.8212	10	0.486583
Method	Holm-Šídák method		Pause	No	0.283469	19.1	22	-2.895	2.554	1.133	10	0.486583
Alpha	0.05
Number of tests performed	3
Number of rows omitted	0
Test name	Paired t test (Split-Miro)			Below threshold?	P value	Mean of Blue light 1st min	Mean of Blue light 7th min	Difference	SE of difference	t ratio	df	Adjusted P Value
Variance assumption	Individual variance for each group		Long run	Yes	0.00458	51.5	31.5	20	6.071	3.294	16	0.013679
Multiple comparisons	Set P value threshold		Short run	No	0.079063	22.91	31.03	-8.121	4.329	1.876	16	0.079063
Method	Holm-Šídák method		Pause	Yes	0.012957	25.59	37.47	-11.88	4.248	2.796	16	0.025747
Alpha	0.05
Number of tests performed	3
Number of rows omitted	0
[truncated: 4 more columns]

## Sheet: Fig. 2G
Motility analysis (561-nm)
Ctrl	wt-Miro	Split-Miro		Kruskal-Wallis test			Dunn's multiple comparisons test	Mean rank diff.	Significant?	Summary	Adjusted P Value
100	100	100		P value	0.0002		Ctrl vs. wt-Miro	-22.62	Yes	**	0.0023	A-B
100	75	100		Exact or approximate P value?	Approximate		Ctrl vs. Split-Miro	-24.93	Yes	***	0.0007	A-C
100	100	100		P value summary	***		wt-Miro vs. Split-Miro	-2.31	No	ns	>0.9999	B-C
100	100	100		Do the medians vary signif. (P < 0.05)?	Yes
66.6667	50	100		Number of groups	3		Test details	Mean rank 1	Mean rank 2	Mean rank diff.	n1	n2	Z
50	100	100		Kruskal-Wallis statistic	16.79		Ctrl vs. wt-Miro	41.87	64.49	-22.62	39	38	3.367
100	100	100					Ctrl vs. Split-Miro	41.87	66.8	-24.93	39	37	3.686
66.6667	100	100		Data summary			wt-Miro vs. Split-Miro	64.49	66.8	-2.31	38	37	0.3395
100	100	100
100	100	75
100	100	100
100	100	100
50	90	57.1429
100	100	100
66.6667	100	100
100	83.3333	100
100	100	100
75	100	85.7143
50	100	100
50	80	100
100	90	100
50	83.3333	100
60	100	50
66.6667	100	100
66.6667	100	75
66.6667	100	50
50	83.3333	100
0	50	100
0	80	100
0	80	75
33.3333	100	100
75	100	50
33.3333	100	80
0	100	100
50	50	100
100	40	100
66.6667	100	66.6667
100	100
50
Motility analysis (488-nm)
	Miro																																								Split-Miro
Blue light 1st min	87.5	87.5	100	100	75	90	100	100	100	80	80	100	100	80	66.6667	62.5	100	100	100	75	100	100	100	83.3333	100	80	100	100	100	75	66.6667	66.6667	40	100	71.4286	100	100	100	100		90.9091	75	33.3333	100	100	75	50	100	66.6667
Blue light 7th min	100	25	100	100	100	80	100	0	100	71.4286	100	100	100	100	100	57.1429	80	100	100	100	85.7143	66.6667	87.5	100	100	60	100	83.3333	83.3333	100	33.3333	0	100	100	100	100	100	91.6667			71.4286	0	0	100	100	33.3333	75	100	50
Mann Whitney test (Miro)			Mann Whitney test (Split-Miro)
P value	0.921		P value	0.0247
Exact or approximate P value?	Exact		Exact or approximate P value?	Exact
P value summary	ns		P value summary	*
Significantly different (P < 0.05)?	No		Significantly different (P < 0.05)?	Yes
One- or two-tailed P value?	Two-tailed		One- or two-tailed P value?	Two-tailed
Sum of ranks in column A,B	1512 , 1491		Sum of ranks in column D,E	2593 , 1685
Mann-Whitney U	732		Mann-Whitney U	782
Difference between medians			Difference between medians
Median of column A	100.0, n=39		Median of column D	100.0, n=50
Median of column B	100.0, n=38		Median of column E	73.21, n=42
Difference: Actual	0		Difference: Actual	-26.79
Difference: Hodges-Lehmann	0		Difference: Hodges-Lehmann	0
[truncated: 41 more columns]

## Sheet: Fig. 2H (561 nm)
Velocity analysis antero
Control	wt-Miro	Split-Miro		Kruskal-Wallis test			Number of families	1
0.355908	0.266958	0.87936		P value	<0.0001		Number of comparisons per family	3
0.140847	0.814969	1.45845		Exact or approximate P value?	Approximate		Alpha	0.05
0.610373	1.11674	1.44606		P value summary	****
0.729223	0.72698	2.12894		Do the medians vary signif. (P < 0.05)?	Yes		Dunn's multiple comparisons test	Mean rank diff.	Significant?	Summary	Adjusted P Value
0.339998	0.9036	0.63867		Number of groups	3		Control vs. wt-Miro	-79.93	Yes	****	<0.0001	A-B
0.719612	1.91516	0.469099		Kruskal-Wallis statistic	43.04		Control vs. Split-Miro	-101	Yes	****	<0.0001	A-C
0.334445	0.523238	0.944497					wt-Miro vs. Split-Miro	-21.07	No	ns	0.2308	B-C
0.813368	1.45941	1.07413		Data summary
0.731785	1.54836	0.912463		Number of treatments (columns)	3		Test details	Mean rank 1	Mean rank 2	Mean rank diff.	n1	n2	Z
0.211858	1.15272	0.619343		Number of values (total)	350		Control vs. wt-Miro	101.1	181.1	-79.93	61	150	5.202
0.338823	0.57396	1.90501					Control vs. Split-Miro	101.1	202.1	-101	61	139	6.5
0.622866	1.82546	0.441335					wt-Miro vs. Split-Miro	181.1	202.1	-21.07	150	139	1.769
0.328572	2.33065	4.3354
1.07435	1.51056	1.06249
0.539576	1.13115	1.37035
0.472943	1.44029	2.2543
0.460449	2.02002	0.460876
0.216556	0.657357	0.759763
0.47668	0.559971	0.802369
0.0927946	2.83798	0.825648
0.541177	1.37633	2.35179
0.655969	1.56202	2.26914
0.132945	1.48717	3.14284
0.923034	0.621265	0.719398
0.293654	0.182706	0.828531
0.68715	0.976853	1.56544
0.437277	0.545555	1.45535
0.210043	0.473263	1.65194
0.486718	0.420512	0.291945
0.199898	0.297925	1.135
0.390933	1.71195	0.261619
0.267706	1.56288	0.759335
0.475933	0.612936	0.856401
0.213566	0.592647	0.697935
1.22043	2.18233	0.448062
0.943536	2.09295	0.328252
0.950371	1.97709	1.90298
0.976319	1.67735	1.1806
0.996608	3.01962	0.394778
0.872098	0.668356	1.45364
0.686936	0.315865	0.8737
0.747482	0.526655	2.19664
1.09698	0.218692	2.12531
0.363597	0.625429	2.27918
0.288528	0.577377	1.5175
0.744279	1.00536	1.02854
1.02042	0.956244	1.64628
0.807281	1.34141	1.87757
0.234923	0.540537	0.716942
0.179182	0.614003	1.00248
0.470594	1.1948	0.664939
0.892387	1.41872	1.31696
1.10147	1.46208	0.841452
0.628846	1.01134	1.6151
0.28746	1.31194	0.723777
0.545769	0.85811	0.877651
1.6246	1.79193	0.68747
0.596171	1.55818	1.14386
0.458314	2.1583	0.823085
0.401078	0.39403	1.61734
1.22491	1.21701	0.761685
	1.12026	1.51525
	2.35286	0.399369
	0.388477	1.07659
	0.974076	1.22705
	1.60687	0.588375
	0.336367	1.64286
	0.600228	1.4168
	0.551215	0.531994
	0.509463	1.5553
	0.712458	0.369577
	0.637069	1.33479
	1.28706	1.09378
	0.536799	2.03539
	0.464293	2.13
	1.0217	1.49496
	1.54974	1.5238
	1.23356	1.61243
	1.01529	0.620838
	1.31343	0.60781
	0.380255	0.863983
	0.404068	1.40505
	0.351637	1.76449
	0.842199	1.54579
	0.569475	2.42398
	0.886407	0.587308
	1.97442	1.68184
	1.11514	1.75626
	0.715341	2.17838
	1.40003	1.9221
	1.17088	1.2609
	0.440908	1.19629
	1.53052	1.47617
	1.22907	0.239301
	0.305614	0.432258
	0.21677	0.758481
	2.13289	0.872526
	0.171067	0.687577
	0.423289	1.41872
	0.722922	0.854266
	0.63504	0.286926
	0.755064	1.32614
	0.30508	0.557729
	0.371285	1.50212
	2.5628	1.73768
	0.311273	1.85248
	0.663231	0.312127
	1.51814	1.08492
	0.609091	1.79812
	1.37195	1.15967
	0.995647	0.911074
	1.45941	0.477748
	0.483301	1.7568
	0.640699	1.35134
	0.317573	0.263114
	0.818707	0.880961
	0.132838	0.205771
	1.27681	1.25374
	1.93545	0.780799
	1.84553	1.53811
	0.73926	1.96641
	0.864624	0.438986
	0.602151	0.614003
	2.29584	1.46442
	1.71793	1.46699
	1.64446	0.533916
	1.00707	0.919297
	0.753569	0.249125
	1.35401	0.669958
	0.199044	0.943216
	0.803117	1.10905
	1.08374	1.05844
	1.2814	0.488106
	0.416134	1.03975
	1.13639	1.18273
	0.924743	0.730397
	0.383138	0.829385
	1.06783	0.514482
	1.48236	1.62204
	0.741716
	0.698362
	2.09146
	2.3172
	0.606956
	1.42769
	1.82279
	0.249125
	0.753249
	1.51632
	0.52249
Velocity analysis retro
Control	wt-Miro	Split-Miro		Kruskal-Wallis test			Number of families	1
1.1413	0.393496	1.24883		P value	0.1125		Number of comparisons per family	3
0.613363	0.455217	0.755705		Exact or approximate P value?	Approximate		Alpha	0.05
0.390827	0.644116	2.02354		P value summary	ns
0.306788	0.444966	1.05363		Do the medians vary signif. (P < 0.05)?	No		Dunn's multiple comparisons test	Mean rank diff.	Significant?	Summary	Adjusted P Value
0.58026	0.581007	0.961049		Number of groups	3		Control vs. wt-Miro	-41.57	No	ns	0.1178	A-B
0.529324	0.258095	0.854266		Kruskal-Wallis statistic	4.369		Control vs. Split-Miro	-38.68	No	ns	0.1857	A-C
0.222323	0.827143	0.288635					wt-Miro vs. Split-Miro	2.886	No	ns	>0.9999	B-C
0.415814	0.587308	0.700391		Data summary
1.12913	0.816571	0.841452		Number of treatments (columns)	3		Test details	Mean rank 1	Mean rank 2	Mean rank diff.	n1	n2	Z
0.414426	0.405349	0.256814		Number of values (total)	426		Control vs. wt-Miro	177.4	219	-41.57	45	217	2.061
1.29133	0.265677	0.741716					Control vs. Split-Miro	177.4	216.1	-38.68	45	164	1.867
0.786565	0.566592	0.423182					wt-Miro vs. Split-Miro	219	216.1	2.886	217	164	0.2266
0.252863	0.339677	0.579726
0.35089	0.692596	0.560612
0.447849	0.799593	0.16498
0.572572	0.532528	0.994472
1.11332	0.809737	0.571611
0.334445	0.415173	0.806854
0.153447	0.653513	0.763073
0.359005	0.932645	0.574921
0.420939	0.751967	0.402786
0.508288	0.316505	0.727514
0.836433	0.849033	0.571824
0.193384	0.367014	1.08919
0.190288	0.825648	0.504337
0.583784	0.590832	1.03334
0.94407	0.718117	0.658532
0.490776	0.386555	0.376838
0.322806	0.787953	0.317253
1.15251	0.721641	0.555273
0.334765	0.505939	1.01038
0.543206	0.397874	1.13649
1.14877	1.32251	0.478709
0.565631	0.865691	0.197229
0.208334	1.04776	1.08342
0.444966	0.565204	1.24584
0.505191	0.401398	0.242184
0.531994	0.2503	0.305827
0.27219	0.458314	0.289382
0.411863	0.854266	2.1662
0.281053	0.705196	0.355908
0.798952	0.431938	0.63237
0.49761	0.747482	0.555273
0.548439	0.684374	0.712778
0.452013	0.308817	0.401612
	0.660454	0.191249
	0.497396	0.469846
	0.658532	0.49462
	0.755278	0.770868
	0.677112	0.568087
	0.331455	0.648815
	0.588589	0.672948
	0.935314	0.732212
	0.306681	0.352705
	0.386448	0.416882
	0.203208	0.887155
	0.483194	0.387303
	0.379187	0.636642
	0.292906	0.551749
	0.762219	0.87007
	0.937877	0.755705
	0.633545	1.01497
	0.685335	1.24135
	0.602471	1.01754
	0.741396	0.723456
	0.709895	0.48533
	0.677326	0.944818
	0.82725	0.230545
	0.756345	0.677219
	0.414212	0.890892
	0.533916	0.386448
	0.568514	1.00141
	0.423182	0.545769
	0.961049	0.826929
	0.811552	0.379294
	0.223711	1.87074
	0.542459	0.387943
	0.805145	0.451907
	0.258949	0.323873
	0.770121	0.728689
	0.65362	0.327504
	0.727087	0.511064
	0.841772	0.30572
	0.614965	0.612722
	0.69676	0.658212
	0.361568	0.285752
	0.360393	0.770334
	0.635467	0.891747
	0.63803	0.281908
	0.233855	0.904881
	0.453188	0.483728
	1.1649	0.511385
	0.540109	0.486825
	0.884592	0.517258
	0.75154	0.686189
	0.779304	0.396593
	0.700925	0.310098
	0.984755	0.574494
	0.322912	0.587308
	0.455964	0.945779
	0.512559	0.196481
	0.452974	0.326223
	0.673375	0.289596
	0.62639	0.504017
	0.703595	0.30508
	0.858537	0.673375
	0.603645	0.199471
	0.414853	0.470594
	0.731785	0.40001
	0.586453	0.510531
	0.509036	0.4707
	0.632691	0.597025
	0.377158	0.298032
	0.974397	0.60749
	0.823085	0.16765
	0.648067	0.594249
	0.760083	0.7572
	0.674336	0.54043
	0.736697	0.691421
	0.728048	0.268667
	0.739367	0.798204
	0.697615	0.578765
	0.608344	0.89495
	0.38442	0.560612
	0.930509	0.41827
	0.634826	0.956564
	0.32035	0.223497
	0.700071	0.583143
	0.708079	0.629167
	0.736804	0.500386
	0.568941	0.692703
	0.648922	0.60514
	0.710429	0.42457
	0.79137	0.313088
	0.297391	0.489067
	0.625109	0.300808
	0.355908	0.65693
	0.39104	0.64465
	0.528363	0.434714
	0.717904	0.540323
	0.504337	0.792759
	0.588803	0.584425
	0.295469	0.674443
	0.455644	0.640699
	0.437598	0.458527
	0.627672	0.392108
	0.422434	0.398622
	0.521209	0.572785
	0.579192	0.323019
	0.156224	0.429269
	0.283723	0.284257
	0.32697	0.898581
	0.506793	0.361782
	0.482019	0.36979
	0.397554	0.263327
	0.57759	0.851703
	0.633758	0.76318
	0.708186	0.410475
	0.704449	1.08791
	0.255105	0.533916
	1.31536	1.09453
	0.431938	0.527296
	0.736163	0.453829
	0.617314	0.846364
	0.478175
	0.440481
	0.379721
	0.518112
	0.37876
	0.621265
	0.514695
	0.369897
	0.367121
	0.566165
	0.606742
	0.739047
	0.694091
	0.5494
	0.463012
	0.243359
	0.777168
	0.306681
	0.517685
	0.753569
	0.927626
	0.962971
	0.524839
	0.85181
	0.569475
	0.209188
	0.61678
	0.68715
	0.593928
	0.625429
	0.697081
	0.521209
	0.518326
	0.609198
	2.11057
	0.458954
	0.718117
	0.404922
	0.450839
	0.490669
	0.558797
	0.461944
	0.629487
	0.736163
	0.251581
	0.416988
	0.427133
	0.449984
	0.224992
	0.376731
	0.726553
	0.525373
	0.239835

## Sheet: Fig. 2H (488 nm)
Velocity analysis antero (Miro)
Blue 1st	Blue 7th		Mann Whitney test
1.56112	0.991416		P value	0.1826
1.07685	0.269211		Exact or approximate P value?	Approximate
1.42113	1.29909		P value summary	ns
1.33324	0.769176		Significantly different (P < 0.05)?	No
1.53835	0.888859		One- or two-tailed P value?	Two-tailed
1.02557	0.64098		Sum of ranks in column A,B	25621 , 22584
0.589701	0.871732		Mann-Whitney U	10956
1.0871	0.803327
0.799943	0.387459		Difference between medians
0.666619	0.483452		Median of column A	1.001, n=158
0.820454	0.228804		Median of column B	0.8666, n=152
1.64091	0.589701		Difference: Actual	-0.1348
0.88568	1.38452		Difference: Hodges-Lehmann	-0.07692
1.00506	1.35888
0.75892	0.421611
1.02557	1.71413
0.837581	0.341822
0.427354	0.649492
1.43579	2.76903
1.33324	0.410227
0.400894	0.717897
0.786303	0.250649
0.692258	0.227881
1.15746	0.296286
1.02557	1.05972
2.18784	0.606008
1.06403	2.25625
2.30753	1.70931
0.717897	0.455762
0.363564	0.427354
0.538423	0.482017
0.820454	0.3931
0.803327	0.683746
0.424893	0.603957
0.676874	0.512784
0.632467	0.683746
0.346129	0.225625
0.589701	0.789687
0.923011	0.523039
0.846093	0.735024
0.574318	1.07685
0.61534	0.553806
0.858913	0.803327
1.48707	1.31273
1.84602	0.584573
0.769176	1.06659
0.410227	0.776457
0.495657	0.358949
0.358949	0.923011
0.330438	0.717897
0.656363	1.07685
0.512784	0.46612
0.444378	0.243572
1.12812	0.3931
0.41956	0.387459
1.30391	1.1794
0.348693	0.502528
1.07685	0.786303
1.33324	1.68193
0.410227	0.574318
0.902499	0.61534
1.41867	0.846093
0.546935	1.25632
1.70931	0.572574
0.854605	0.586009
1.23068	0.999928
0.840965	1.21786
1.16228	1.96909
0.776457	1.43579
0.205113	0.666619
0.430738	1.12812
1.12812	0.786303
1.39477	1.02557
1.58963	0.738409
1.01275	0.974289
2.25625	0.913678
1.36985	0.702103
0.444378	1.23068
1.29909	1.09736
1.41528	2.28189
1.12812	0.487145
1.06659	0.888859
2.38444	1.02557
2.01698	0.854605
2.41008	0.521296
0.542115	1.33324
0.331361	0.528577
0.846093	1.42441
0.769176	0.697386
0.692258	0.981571
0.881988	1.06956
0.875629	0.600675
2.69211	1.05757
0.61534	1.21202
1.68193	0.676874
1.51784	0.75892
4.76889	3.56385
0.546935	1.91925
0.527449	2.20497
1.0871	1.53835
1.46143	1.49169
0.999928	1.78746
0.72723	0.94865
0.444378	0.638108
2.38444	1.33324
1.66142	1.60676
1.10761	1.35888
1.38452	0.672362
0.384588	1.12812
1.1794	0.30767
0.632467	4.82017
0.571344	1.12812
1.12812	1.1794
0.564062	0.527449
1.38452	1.07685
0.543551	0.897371
0.341822	0.769176
1.84602	1.26801
2.09513	1.07685
1.64091	0.461505
1.90756	0.427354
0.656363	1.94858
1.88017	0.943522
0.424893	0.840965
1.16915	0.589701
1.18966	0.322336
0.22224	1.5042
1.72634	0.987109
0.529911	0.542115
1.64091	0.256392
1.81187	1.60245
0.843222	3.33309
0.752049	5.84573
1.52697	1.02557
0.430738	0.594829
0.365307	0.5014
1.32298	1.12812
1.0028	1.61014
1.82038	1.77762
1.1794	1.02557
1.61527	1.25632
1.23068	0.61534
1.33324	2.05113
1.02557	1.33324
0.600675	0.877475
1.61527	0.861477
1.94858	1.64091
2.19471	1.05972
1.51271	1.33324
0.820454	0.666619
0.820454	0.581189
0.45125	1.8973
1.12812
0.717897
1.07685
0.205113
1.60676
0.656363
Velocity analysis retro (Miro)
Blue 1st	Blue 7th		Mann Whitney test
0.717897	0.820454		P value	0.2216
0.46612	0.786303		Exact or approximate P value?	Approximate
0.630006	0.292287		P value summary	ns
0.652671	0.574318		Significantly different (P < 0.05)?	No
0.64098	0.347975		One- or two-tailed P value?	Two-tailed
0.587753	0.632467		Sum of ranks in column A,B	52263 , 46084
0.341822	0.301619		Mann-Whitney U	22864
0.653799	0.692258
0.968546	0.467249		Difference between medians
0.512784	0.427354		Median of column A	0.6153, n=228
0.576882	0.881988		Median of column B	0.5469, n=215
0.62816	0.432995		Difference: Actual	-0.06841
0.3931	0.5776		Difference: Hodges-Lehmann	-0.02666
0.738409	0.410227
0.30767	1.79474
0.512784	0.858913
0.3931	0.553806
0.30767	0.589701
0.80907	0.752049
0.584573	0.556781
0.482017	0.752049
0.533295	1.14864
0.341822	0.864451
0.659337	0.879014
0.512784	0.743536
0.600675	0.498118
0.581189	0.474325
0.546935	0.649492
0.528988	0.712154
0.216497	0.410227
0.735024	0.493503
0.923011	0.512784
0.786303	0.840965
1.19653	0.399971
0.428277	0.861477
0.697386	0.218754
0.666619	0.538423
0.600675	0.322336
0.752049	0.881988
0.820454	0.330438
0.187987	0.410227
0.666619	0.542115
0.61534	0.495657
1.12812	0.494118
0.666619	1.53835
0.656363	0.427354
1.26483	1.1794
0.430738	0.538423
0.461505	0.512784
0.30767	0.282031
0.391562	0.454224
0.471761	0.387459
0.384588	0.512784
0.57801	0.410227
0.448686	0.589701
0.524168	0.632467
0.315567	0.666619
0.683746	0.542115
0.476171	0.64098
0.447558	0.769176
0.864451	0.326336
0.676874	0.341822
0.833274	0.589701
0.773791	0.227881
0.676874	0.521296
0.621391	0.337001
0.488375	1.13951
0.752049	0.717897
0.69513	0.242444
0.397407	0.474325
1.33324	0.83071
0.250649	0.968546
1.43579	0.781995
0.432995	0.836248
0.512784	1.46995
0.410227	1.10761
2.35881	0.991416
0.656363	0.37946
0.897371	0.482017
0.492272	0.538423
0.564062	0.261007
0.656363	0.786303
0.676874	0.683746
0.430738	0.635852
0.64098	1.20504
0.80466	0.444378
0.871732	0.888859
0.68713	0.854605
0.512784	0.923011
1.12812	0.322336
0.697386	0.339258
0.564062	0.871732
1.1794	0.454224
0.879014	0.974289
0.656363	0.512784
1.03839	0.376076
0.704257	0.3931
0.457608	0.410227
0.794815	0.69513
0.423047	0.430738
0.708565	0.717897
1.09397	0.430738
0.683746	0.879014
0.854605	1.84602
1.03839	0.564062
1.09397	0.902499
0.683746	0.774919
0.61534	0.410227
0.427354	0.791123
0.228804	0.410227
0.468787	0.193012
0.45125	0.45125
1.09397	0.61534
0.717897	0.781995
0.820454	0.449711
0.957162	0.376076
0.786303	1.0629
1.14864	0.786303
0.492272	0.584573
0.564062	0.291876
0.683746	0.395561
1.12812	0.666619
0.854605	0.793071
0.799943	0.476171
0.820454	0.871732
1.00844	0.49699
0.88568	0.362846
0.694617	0.256392
0.857785	0.940138
0.468787	0.635852
0.786303	0.461505
0.807634	0.543551
0.643338	1.10946
0.646107	0.358949
0.448686	0.45125
0.455762	0.61534
1.18668	0.444378
0.337001	0.854605
0.61534	0.140298
0.529911	0.348693
0.871732	0.341822
0.635852	0.227881
0.600675	0.858913
0.45125	0.733691
0.786303	0.571344
0.468787	0.410227
0.333309	0.794815
0.512784	0.626724
0.187063	0.30767
0.649492	0.279159
0.806814	0.284903
0.773073	0.487145
0.932343	0.471761
0.426021	0.487145
0.594829	0.485401
0.492272	0.546935
0.635852	1.18966
0.710616	0.464479
0.346129	0.905884
0.356692	0.769176
0.34777	0.699232
0.623237	0.774919
0.512784	0.492272
0.999928	0.769176
0.391562	0.512784
0.487145	0.596675
0.461505	0.475453
0.3931	0.717897
0.341822	1.01706
0.539756	0.779431
0.341822	0.697386
1.25632	0.525603
0.905884	0.395561
0.735024	0.529911
0.564062	0.5014
0.322336	0.586009
1.02557	0.399971
0.487145	0.529911
0.581189	0.786303
0.430738	0.820454
0.30767	0.999928
0.602521	0.543551
0.376076	0.902499
0.769176	0.266648
0.504887	0.786303
1.00506	0.991416
0.594829	0.748664
0.651953	0.498118
0.351667	0.461505
0.892244	0.461505
0.769176	0.439558
0.471761	0.512784
0.45125	0.769176
0.656363	0.410227
0.923011	0.410227
0.680567	0.46489
0.828351	0.594829
0.820454	0.30767
0.495657	0.6739
0.540782	0.528577
0.384588	0.774919
0.837581	0.435866
0.662722	0.297415
0.649492	0.546935
0.589701	0.705078
0.765791	0.820454
0.30767	0.543551
0.875629	0.504887
0.282031	0.735024
0.600675	0.683746
0.499964	0.593393
0.37946	0.634006
0.752049	0.471761
0.394433	0.70077
0.536474	0.840965
0.639441
0.438225
0.461505
0.533295
0.322336
0.322336
0.455762
0.717897
0.820454
0.474325
0.435866
0.625596
0.564062
Velocity analysis antero (Split-Miro)
Blue 1st	Blue 7th		Mann Whitney test
0.659337	1.58666		P value	0.2278
1.43579	0.803327		Exact or approximate P value?	Exact
0.735024	0.94865		P value summary	ns
0.30767	0.729281		Significantly different (P < 0.05)?	No
1.43579	1.05633		One- or two-tailed P value?	Two-tailed
0.717897	0.27034		Sum of ranks in column A,B	30686 , 12093
1.70931	1.07685		Mann-Whitney U	8177
0.214446	1.84602
0.61534	0.512784		Difference between medians
0.239265	0.861477		Median of column A	0.9802, n=204
0.546935	0.589701		Median of column B	0.8681, n=88
0.170962	0.943522		Difference: Actual	-0.1121
0.186448	0.410227		Difference: Hodges-Lehmann	-0.07692
0.794815	0.769176
1.92807	1.10761
2.05113	0.529911
1.23068	1.52369
1.05121	0.846093
1.05121	0.923011
0.968546	1.14864
1.15376	0.991416
0.738409	1.79936
0.957162	0.122043
0.692258	0.861477
0.346129	0.888859
0.512784	0.490016
2.01698	3.64076
0.752049	0.910191
0.849785	2.5229
2.07677	1.5444
1.53835	0.820454
1.5725	1.66655
0.957162	1.1794
0.454224	0.999928
1.7288	1.61722
0.30767	1.10248
0.461505	0.676874
0.524168	1.44092
0.410227	1.77762
0.697386	0.41956
0.546935	0.94865
1.51784	0.923011
0.743536	0.786303
2.69211	0.861477
1.48707	0.786303
1.33324	0.296286
1.02557	0.589701
0.239265	0.788866
0.952342	1.66142
1.35375	1.40164
0.358949	0.897371
0.560165	1.77762
0.61534	1.70244
1.43579	0.786303
0.533295	0.69513
1.05972	1.38452
2.28702	1.12812
0.75892	1.58963
0.923011	0.512784
1.41528	1.28196
0.779431	0.512784
1.10402	0.747228
1.42215	1.19653
1.00844	1.93145
0.564062	1.20504
0.881988	0.533295
1.30309	0.881988
1.99986	0.492272
1.23068	0.752049
1.83464	0.820454
1.77546	0.380896
1.19653	0.594829
2.54341	0.543551
1.86879	0.888859
1.96571	0.717897
1.05121	1.26483
1.09879	0.64098
0.683746	0.717897
0.957162	1.05972
1.12812	0.871732
1.81187	0.854605
0.157732	0.666619
1.55548	0.364692
1.12812	0.581189
0.717897	0.864451
1.05972	0.474325
6.1534	0.512784
1.12812	1.56399
0.61534
0.843222
1.14864
0.820454
1.66142
2.2221
0.961469
1.26483
1.12812
0.424893
1.33324
0.769176
0.846093
1.8973
0.974289
0.897371
0.630006
1.22135
1.37723
0.820454
2.42721
1.32042
0.943522
1.1794
1.23068
0.471761
0.410227
0.420483
0.420483
1.37272
0.401715
1.40164
1.52553
0.981571
0.478632
1.44861
1.33324
0.761894
0.692258
1.43579
0.589701
1.5725
2.05113
0.541294
1.28196
2.51264
1.71413
0.820454
0.30767
1.06659
1.86069
1.98273
0.978904
0.923011
0.820454
0.799943
0.454224
0.666619
0.888859
0.61534
3.99971
0.410227
1.28196
1.43579
0.871732
0.794815
0.683746
1.21355
1.09879
1.77762
0.256392
1.11961
1.92294
0.282031
0.854605
1.64091
1.46995
0.30767
1.12812
1.74346
1.41016
2.70063
0.483452
0.632467
1.05972
0.897371
1.70931
0.75892
0.546935
0.37946
1.02557
1.28924
0.395561
0.871732
1.18966
0.529911
1.52369
0.997569
2.01698
0.6739
1.02557
0.871732
0.538423
0.282031
0.656363
0.498118
1.78449
0.820454
0.64098
1.23068
1.02557
1.14094
1.02557
2.42034
0.478632
0.933266
Velocity analysis retro (Split-Miro)
Blue 1st	Blue 7th		Mann Whitney test
0.743536	0.410227		P value	0.1402
0.897371	0.726409		Exact or approximate P value?	Approximate
0.402945	0.649492		P value summary	ns
0.326336	0.30767		Significantly different (P < 0.05)?	No
0.923011	0.30767		One- or two-tailed P value?	Two-tailed
0.256392	0.358949		Sum of ranks in column A,B	43627 , 21354
0.196601	0.61534		Mann-Whitney U	13353
0.769176	0.337001
1.39477	0.45125		Difference between medians
1.48707	0.769176		Median of column A	0.6527, n=234
1.12812	2.25625		Median of column B	0.6153, n=126
1.1794	0.410227		Difference: Actual	-0.03738
0.945778	0.683746		Difference: Hodges-Lehmann	-0.03789
0.991416	0.757792
0.945778	0.598213
0.786303	0.589701
0.430738	0.430738
0.692258	0.358949
0.520065	0.666619
0.683746	0.635852
0.520065	0.430738
0.594829	0.923011
0.317926	0.313413
0.61534	0.529911
0.338437	0.461505
0.294851	0.581189
0.864451	0.803327
0.854605	0.492272
0.923011	0.653799
0.670516	0.638108
0.633185	0.30767
0.512784	0.837581
0.571344	0.738409
0.619443	0.478632
0.743536	0.457608
0.574318	0.348693
0.484786	0.764048
0.769176	0.974289
1.74346	0.783841
0.803327	1.3076
1.16228	0.439558
0.276903	0.473299
0.635852	0.672977
0.512784	0.5014
0.45125	0.395561
0.423047	0.358949
0.540782	1.07685
0.395561	0.256392
0.749895	0.617802
1.12812	1.04023
0.61534	0.888859
0.61534	0.594829
0.535551	0.786303
0.923011	0.923011
0.697386	0.820454
1.02557	0.523039
1.02557	0.747228
0.849785	0.794815
0.704565	0.45125
0.621391	1.20504
0.717897	0.454224
0.879014	0.703232
1.02557	0.439558
0.917575	0.512784
0.813172	0.461505
0.333309	0.410227
0.646107	0.738409
0.49699	0.676874
0.49699	0.30767
1.08413	0.888859
0.706513	1.21355
0.717897	0.717897
0.512784	1.19653
0.940138	0.487145
0.708565	0.45125
1.1794	0.553806
0.568677	0.61534
0.55555	0.544781
0.544371	0.564062
0.779431	0.752049
0.435866	0.61534
0.45125	0.468787
0.888859	0.786303
0.594829	1.1794
1.09397	0.666619
0.739844	0.558319
0.603239	0.676874
0.676874	0.752049
0.743536	1.07685
0.880244	0.893679
0.702103	0.676874
0.373614	0.525603
1.09397	0.61534
1.35601	0.738409
0.789687	2.35881
0.553806	0.683746
1.94858	0.61534
0.756356	0.717897
0.430738	0.495657
0.897371	0.923011
0.703232	0.574318
0.489093	0.776457
0.717897	0.376076
0.820454	0.341822
0.57801	0.603957
1.58963	0.69513
0.632467	0.542115
0.589701	0.564062
0.94865	0.799943
0.763432	0.369204
0.623237	0.6017
0.439558	1.48707
0.659337	0.902499
0.965777	0.769176
0.905884	0.923011
0.410227	0.553806
0.433918	0.666619
0.30767	0.574318
1.02557	0.538423
0.64098	0.546935
0.598213	0.589701
0.605085	0.546935
0.438225	0.794815
0.503451	0.30767
0.440994	0.587342
0.550114	0.61534
0.605085
0.512784
0.797686
0.884552
0.61534
0.717897
0.846093
0.556781
2.35881
0.542115
0.592573
0.854605
0.820454
0.666619
0.567036
0.507348
0.606828
0.474325
1.02557
0.781995
0.256392
0.902499
0.461505
0.348693
0.897371
0.376076
0.660876
0.322336
1.02557
0.474325
0.940138
0.683746
0.410227
0.584573
0.322336
0.293005
0.683746
0.337001
0.717897
0.36623
0.61534
0.478632
0.871732
0.512784
0.957162
0.692258
1.0871
0.387459
1.53835
0.448686
0.61534
0.559447
0.512784
0.556781
0.776457
0.666619
0.683746
0.705078
0.666619
0.61534
0.546935
0.421611
1.23068
0.520065
0.556781
0.666619
0.608982
0.358949
0.900243
0.282031
0.475453
0.333309
0.30767
0.538423
0.820454
0.61534
0.576882
0.608059
0.683746
0.666619
0.444378
0.395561
0.773791
0.676874
0.752049
0.888859
0.984545
1.12812
1.16915
0.854605
1.43579
0.779431
0.341822
1.10761
1.09397
0.75892
0.592573
0.810198
0.431866
0.469607
0.454224
0.881988
0.644672
0.61534
0.732563
0.61534
0.364692
1.14864

## Sheet: Fig. 3B-D
Aspect Ratio analysis
Time	Miro																Split-Miro
0	1.98586	1.87267	1.98317	1.85284	1.77643	1.8032	2.34793	2.0165	1.98637	2.29833	1.628	2.16923	1.89278	1.85195	2.00115		2.286	1.58191	1.7327	1.69893	2.21897	1.65089	1.84003	2.23153	1.46535	2.5139	2.0416	2.00926	2.02053	1.70318	1.58897
3	1.50718	2.016	2.13714	1.91579	1.65622	1.82032	2.51028	2.12657	2.16349	1.94914	2.02098	1.72695	1.84074	2.24088	1.93096		1.81482	1.34621	1.59987	1.46318	1.60949	1.55133	1.42263	1.58652	1.6817	1.79936	2.17135	1.57978	1.62056	1.59397	1.92516
7	1.73904	2.06763	2.32342	2.15055	2.05586	1.66464	2.11685	1.92323	1.98249	1.93327	1.82425	1.49045	1.68657	2.05305	2.21076		1.78765	1.41647	1.56191	1.48074	1.51403	1.87871	1.46568	1.3897	1.40095	1.73155	1.74327	1.46944	1.37414	1.72931	1.75021
Repeated measures ANOVA summary (Miro)			Tukey's multiple comparisons test	Mean Diff.	95.00% CI of diff.	Below threshold?	Summary	Adjusted P Value
Assume sphericity?	No		0 vs. 3	-0.006416	-0.1863 to 0.1735	No	ns	0.9952	A-B
F	0.05766		0 vs. 7	0.01629	-0.1831 to 0.2156	No	ns	0.9751	A-C
P value	0.9359		3 vs. 7	0.02271	-0.1372 to 0.1826	No	ns	0.9271	B-C
P value summary	ns
Statistically significant (P < 0.05)?	No		Test details	Mean 1	Mean 2	Mean Diff.	SE of diff.	n1	n2	q	DF
Geisser-Greenhouse's epsilon	0.9405		0 vs. 3	1.964	1.971	-0.006416	0.06874	15	15	0.132	14
R squared	0.004102		0 vs. 7	1.964	1.948	0.01629	0.07616	15	15	0.3025	14
			3 vs. 7	1.971	1.948	0.02271	0.06108	15	15	0.5257	14
Repeated measures ANOVA summary (Split-Miro)			Tukey's multiple comparisons test	Mean Diff.	95.00% CI of diff.	Below threshold?	Summary	Adjusted P Value
Assume sphericity?	No		0 vs. 3	0.2545	0.04126 to 0.4678	Yes	*	0.0192	A-B
F	10.67		0 vs. 7	0.326	0.09775 to 0.5543	Yes	**	0.0058	A-C
P value	0.0015		3 vs. 7	0.07148	-0.05315 to 0.1961	No	ns	0.3202	B-C
P value summary	**
Statistically significant (P < 0.05)?	Yes		Test details	Mean 1	Mean 2	Mean Diff.	SE of diff.	n1	n2	q	DF
Geisser-Greenhouse's epsilon	0.7374		0 vs. 3	1.906	1.651	0.2545	0.08148	15	15	4.417	14
R squared	0.4325		0 vs. 7	1.906	1.58	0.326	0.08721	15	15	5.287	14
			3 vs. 7	1.651	1.58	0.07148	0.04762	15	15	2.123	14
Branches analysis
Time	Miro																Split-Miro
0	1.45455	0.272727	1	0.454545	0.636364	0.636364	1.72727	1.27273	0.818182	1.54545	1.45455	0.363636	1.27273	0.454545	1.63636		0.645161	0.913978	1.12903	0.698925	3.06452	1.39785	0.591398	0.376344	0.913978	0.376344	1.55914	0.860215	0.537634	0.483871	1.45161
3	1.90909	0.272727	1.72727	0.636364	1.36364	0.818182	1.63636	1.18182	1.36364	1	0.272727	0.909091	1.09091	0.454545	1.45455		0.268817	0.483871	0.645161	0.430108	0.698925	0.376344	0.430108	0.16129	0.322581	0.268817	0.591398	0.376344	0.16129	0.483871	0.16129
7	1.27273	0.454545	1.54545	0.636364	0.454545	0.454545	0.818182	0.727273	1.09091	0.727273	0.818182	2.36364	0.818182	0.818182	0.818182		0.268817	0.16129	1.02151	0.16129	0.591398	0.268817	0.537634	0.0537634	0.376344	0.16129	0.322581	0.376344	0.483871	0.268817	0.16129
Repeated measures ANOVA summary (Miro)			Tukey's multiple comparisons test	Mean Diff.	95.00% CI of diff.	Below threshold?	Summary	Adjusted P Value
Assume sphericity?	No		0 vs. 3	-0.07273	-0.4165 to 0.2711	No	ns	0.8463	A-B
F	0.4409		0 vs. 7	0.07879	-0.4208 to 0.5784	No	ns	0.9109	A-C
P value	0.6156		3 vs. 7	0.1515	-0.2578 to 0.5608	No	ns	0.6075	B-C
P value summary	ns
Statistically significant (P < 0.05)?	No		Test details	Mean 1	Mean 2	Mean Diff.	SE of diff.	n1	n2	q	DF
Geisser-Greenhouse's epsilon	0.8443		0 vs. 3	1	1.073	-0.07273	0.1314	15	15	0.783	14
R squared	0.03053		0 vs. 7	1	0.9212	0.07879	0.1909	15	15	0.5838	14
			3 vs. 7	1.073	0.9212	0.1515	0.1564	15	15	1.37	14
Repeated measures ANOVA summary (Split-Miro)			Tukey's multiple comparisons test	Mean Diff.	95.00% CI of diff.	Below threshold?	Summary	Adjusted P Value
Assume sphericity?	No		0 vs. 3	0.6093	0.2009 to 1.018	Yes	**	0.0042	A-B
F	14.43		0 vs. 7	0.6523	0.2123 to 1.092	Yes	**	0.0044	A-C
P value	0.0011		3 vs. 7	0.04301	-0.09376 to 0.1798	No	ns	0.6954	B-C
P value summary	**
Statistically significant (P < 0.05)?	Yes		Test details	Mean 1	Mean 2	Mean Diff.	SE of diff.	n1	n2	q	DF
Geisser-Greenhouse's epsilon	0.5744		0 vs. 3	1	0.3907	0.6093	0.1561	15	15	5.522	14
R squared	0.5075		0 vs. 7	1	0.3477	0.6523	0.1681	15	15	5.487	14
			3 vs. 7	0.3907	0.3477	0.04301	0.05226	15	15	1.164	14
Contingency analysis
	Mito collapse	No mito collapse		P value and statistical significance					P value and statistical significance
wt-Miro	7	93		Test	Fisher's exact test				Test	Chi-square
Split-Miro	100	0		P value	<0.0001				Chi-square, df	35.90, 2
Split-Miro and Miro RNAi	100	0		P value summary	****				P value	<0.0001
				One- or two-sided	Two-sided				P value summary	****
				Statistically significant (P < 0.05)?	Yes				One- or two-sided	NA
									Statistically significant (P < 0.05)?	Yes
				Data analyzed	Mito collapse	No mito collapse	Total
				wt-Miro	1	14	15		Data analyzed
				Split-Miro	15	0	15		Number of rows	3
				Total	16	14	30		Number of columns	2
				Percentage of row total	Mito collapse	No mito collapse
				wt-Miro	6.67%	93.33%
				Split-Miro	100.00%	0.00%
				Percentage of column total	Mito collapse	No mito collapse
				wt-Miro	6.25%	100.00%
				Split-Miro	93.75%	0.00%
				Percentage of grand total	Mito collapse	No mito collapse
				wt-Miro	3.33%	46.67%
				Split-Miro	50.00%	0.00%

## Sheet: Fig. 3F-G
Aspect Ratio analysis_SNPH
Time	Split-Miro														Split-Miro + SNPH
0	1.89533	2.26867	2.81762	3.00533	1.69971	1.94768	2.24544	1.84833	2.78412	2.72887	2.28693	2.08106	1.91592		2.41277	2.95127	2.20379	2.44209	2.75278	1.78629	3.86025	2.79096	2.0798	1.94535	1.78191	2.54235	3.96575	2.06913	2.93887	2.09527
3	1.55348	2.39408	2.11883	2.17973	1.36468	2.18552	2.03971	1.81756	2.01793	2.90725	2.04229	1.7099	1.731		2.16803	2.91423	1.89989	1.9922	2.77541	1.8335	3.23625	2.62213	2.1496	1.96493	2.20246	2.71976	3.21989	2.512	2.66473	2.13133
7	1.55481	2.05891	1.86373	1.78784	1.39776	2.13592	1.88305	1.44833	2.10027	2.61081	2.057	1.66873	1.57564		2.34464	2.45031	1.60233	2.2295	2.71575	2.394	3.38718	3.0561	1.94227	1.70116	2.23025	2.55662	4.47365	2.04367	2.30658	1.97518
Repeated measures ANOVA summary (Split-Miro)			Tukey's multiple comparisons test	Mean Diff.	95.00% CI of diff.	Below threshold?	Summary	Adjusted P Value
Assume sphericity?	No		0 vs. 3	0.2664	0.009826 to 0.5230	Yes	*	0.0418	A-B
F	12.35		0 vs. 7	0.414	0.1471 to 0.6810	Yes	**	0.0036	A-C
P value	0.0015		3 vs. 7	0.1476	0.02440 to 0.2709	Yes	*	0.0195	B-C
P value summary	**
Statistically significant (P < 0.05)?	Yes		Test details	Mean 1	Mean 2	Mean Diff.	SE of diff.	n1	n2	q	DF
Geisser-Greenhouse's epsilon	0.6689		0 vs. 3	2.271	2.005	0.2664	0.09617	13	13	3.917	12
R squared	0.5071		0 vs. 7	2.271	1.857	0.414	0.1001	13	13	5.851	12
			3 vs. 7	2.005	1.857	0.1476	0.04619	13	13	4.52	12
Repeated measures ANOVA summary (Split-Miro+SNPH)			Tukey's multiple comparisons test	Mean Diff.	95.00% CI of diff.	Below threshold?	Summary	Adjusted P Value
Assume sphericity?	No		0 vs. 3	0.1008	-0.1150 to 0.3166	No	ns	0.464	A-B
F	0.5791		0 vs. 7	0.07559	-0.1724 to 0.3236	No	ns	0.7137	A-C
P value	0.5491		3 vs. 7	-0.02518	-0.3153 to 0.2649	No	ns	0.9724	B-C
P value summary	ns
Statistically significant (P < 0.05)?	No		Test details	Mean 1	Mean 2	Mean Diff.	SE of diff.	n1	n2	q	DF
Geisser-Greenhouse's epsilon	0.8958		0 vs. 3	2.539	2.438	0.1008	0.08308	16	16	1.715	15
R squared	0.03717		0 vs. 7	2.539	2.463	0.07559	0.09549	16	16	1.119	15
			3 vs. 7	2.438	2.463	-0.02518	0.1117	16	16	0.3188	15
Branches analysis_SNPH
Time	Split-Miro															Split-Miro + SNPH
0	1.38197	0.360515	0.72103	0.781116	0.961373	0.660944	1.02146	0.660944	1.02146	0.841202	0.781116	0.781116	3.18455	0.841202		0.39604	0.712871	0.792079	0.871287	1.34653	1.58416	1.50495	0.554455	0.871287	0.39604	0.712871	1.18812	3.08911	0.554455	0.39604	1.0297
3	0.781116	0.180258	0.660944	0.480687	0.540773	0.72103	0.781116	1.14163	0.901288	0.420601	0.841202	0.420601	1.80258	0.660944		0.39604	0.39604	1.50495	0.237624	0.871287	1.58416	1.18812	0.39604	0.554455	1.34653	1.26733	1.58416	1.66337	0.712871	0.554455	1.10891
7	0.961373	0.180258	0.300429	0.961373	0.420601	0.72103	0.360515	1.44206	0.781116	0.300429	0.781116	0.180258	0.961373	0.540773		0.39604	0.39604	1.18812	0.39604	0.871287	1.50495	1.0297	0.712871	0.792079	0.475248	0.475248	1.74257	1.10891	0.871287	0.554455	0.792079
Friedman test (Split-Miro)			Dunn's multiple comparisons test	Rank sum diff.	Significant?	Summary	Adjusted P Value
P value	0.0234		0 vs. 3	8.5	No	ns	0.3246	A-B
Exact or approximate P value?	Approximate		0 vs. 7	14	Yes	*	0.0245	A-C
P value summary	*		3 vs. 7	5.5	No	ns	0.8959	B-C
Are means signif. different? (P < 0.05)	Yes
Number of groups	3		Test details	Rank sum 1	Rank sum 2	Rank sum diff.	n1	n2	Z
Friedman statistic	7.509		0 vs. 3	35.5	27	8.5	14	14	1.606
			0 vs. 7	35.5	21.5	14	14	14	2.646
Data summary			3 vs. 7	27	21.5	5.5	14	14	1.039
Number of treatments (columns)	3
Number of subjects (rows)	14
Friedman test (Split-Miro+SNPH)			Dunn's multiple comparisons test	Rank sum diff.	Significant?	Summary	Adjusted P Value
P value	0.6271		0 vs. 3	1	No	ns	>0.9999	A-B
Exact or approximate P value?	Approximate		0 vs. 7	5	No	ns	>0.9999	A-C
P value summary	ns		3 vs. 7	4	No	ns	>0.9999	B-C
Are means signif. different? (P < 0.05)	No
Number of groups	3		Test details	Rank sum 1	Rank sum 2	Rank sum diff.	n1	n2	Z
Friedman statistic	0.9333		0 vs. 3	34	33	1	16	16	0.1768
			0 vs. 7	34	29	5	16	16	0.8839
Data summary			3 vs. 7	33	29	4	16	16	0.7071
Number of treatments (columns)	3
Number of subjects (rows)	16

[truncated: 32 more sheets: Fig. 4B, Fig. 4C, Fig. 4D-E, Fig. 4G-H, Fig. 5C-D, Fig. 5E-F, Fig. 6C, Fig. 6D-F, Fig. 7A, Fig. 7C, Fig. 7D-E, Fig. 7F, Fig. 7G-H, Fig. 7I, Fig. 7J-K, S1C-D Fig., S1F-G Fig., S2B-C Fig., S2G Fig., S2H Fig. …]
